# Supplementary material for: Chemical synthesis and biological study of 4β-carboxymethyl-epiafzelechin acid, an osteoprotective compound from the rhizomes of Drynaria fortunei
Source: Royal Society of Chemistry journal article supplement (doi:10.1039/c2md20082a), 2012-01-01
Supplement: c2md20082a.pdf [file c2md20082a.pdf]

## Electronic Supporting Information

### **Chemical synthesis and biological study of 4 $\beta$ -carboxymethyl-*epiafzelechin* acid, an osteoprotective compound from the rhizomes of *Drynaria fortunei***

Man Chun Law, Ka Chun Wong, Wai Ying Pang, Man Sau Wong,\* Tak Hang Chan\*

Department of Applied Biology and Chemical Technology and Laboratory of the  
Institute of Molecular Technology for Drug Discovery and Synthesis, The Hong Kong  
Polytechnic University, Hong Kong SAR; and State Key Laboratory in Chinese  
Medicine and Molecular Pharmacology, Shenzhen, China

AUTHOR'S E-MAIL ADDRESS: [bcchanth@polyu.edu.hk](mailto:bcchanth@polyu.edu.hk);

Figures:

1.  $^1\text{H}$  NMR of compound **15a**.
2. 2D NMR (COSY) of compound **15a**.
3. 2D NMR (NOESY) of compound **15a**.
4.  $^1\text{H}$  NMR of compound **15b**.
5. 2D NMR (COSY) of compound **15b**.
6. 2D NMR (NOESY) of compound **15b**.
7.  $^1\text{H}$  NMR of compound **16**.
8. 2D NMR (COSY) of compound **16**.
9. 2D NMR (NOESY) of compound **16**.
10.  $^1\text{H}$  NMR of compound **17a**.
11. 2D NMR (NOESY) of compound **17**.
12.  $^1\text{H}$  NMR of compound **12**.
13.  $^{13}\text{C}$  NMR of compound **12**.
14. IR of compound **12**.
15.  $^1\text{H}$  NMR of compound **13**.
16.  $^{13}\text{C}$  NMR of compound **13**.
17. IR of compound **13**.
18.  $^1\text{H}$  NMR of compound **12Na**.
19.  $^{12}\text{C}$  NMR of compound **12Na**.

Archive directory: /export/home/joe/vnarsys/data  
Sample directory:  
File: PROTON

Pulse Sequence: s2pul  
Solvent: CDCl3  
Ambient temperature  
INNOVA-500 "nmr500"

Relax. delay 1.000 sec  
Pulse 45.0 degrees  
Acq. Time 1.852 sec  
Width 7596.0 Hz  
8 repetitions  
OBSERVE F1: 499.7394496 MHz  
DATA PROCESSING  
FT size 32768  
Total time 8 min, 23 sec

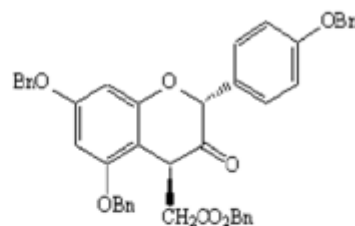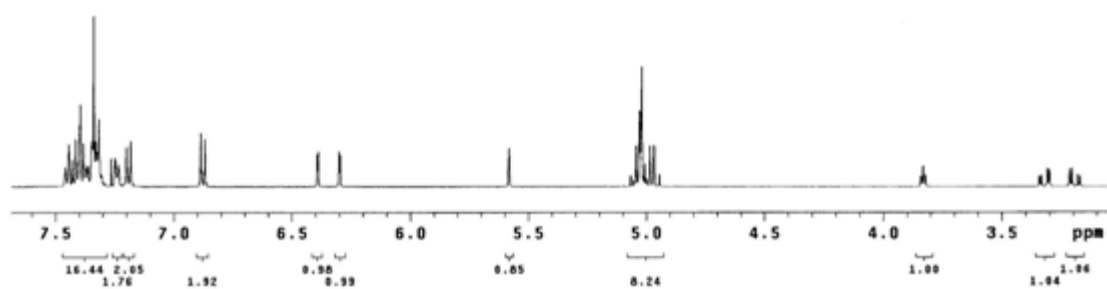

1. <sup>1</sup>H NMR of compound 15a.

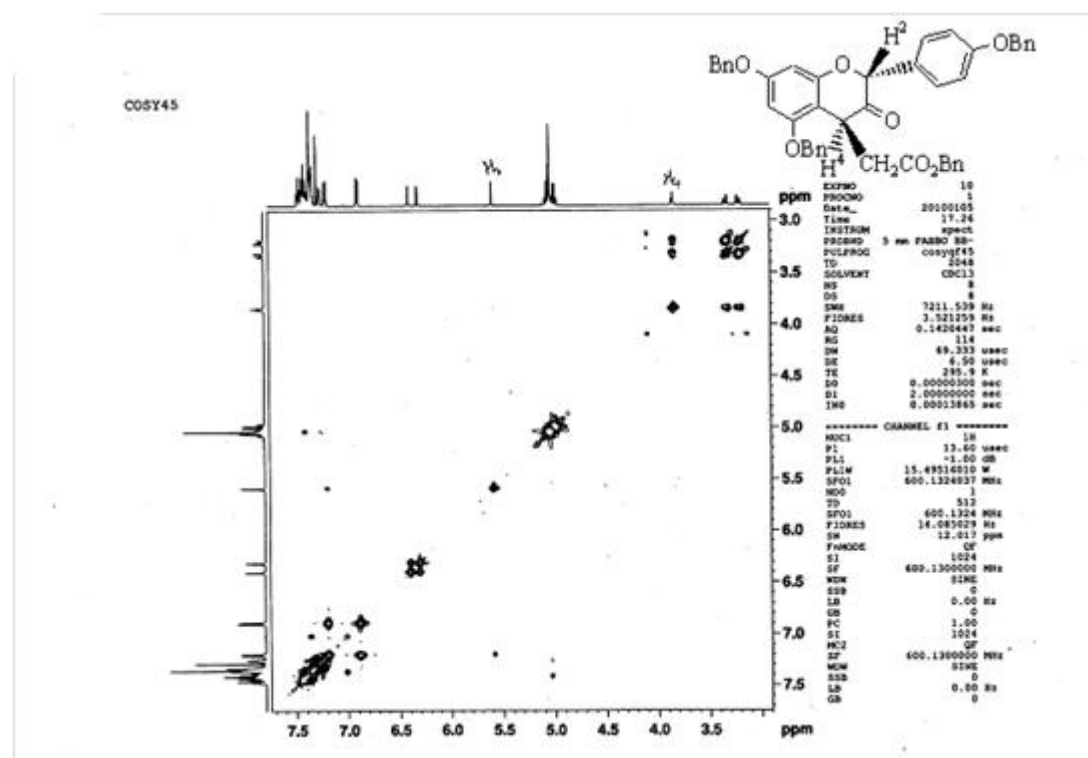

2. 2D NMR (COSY) of compound 15a.

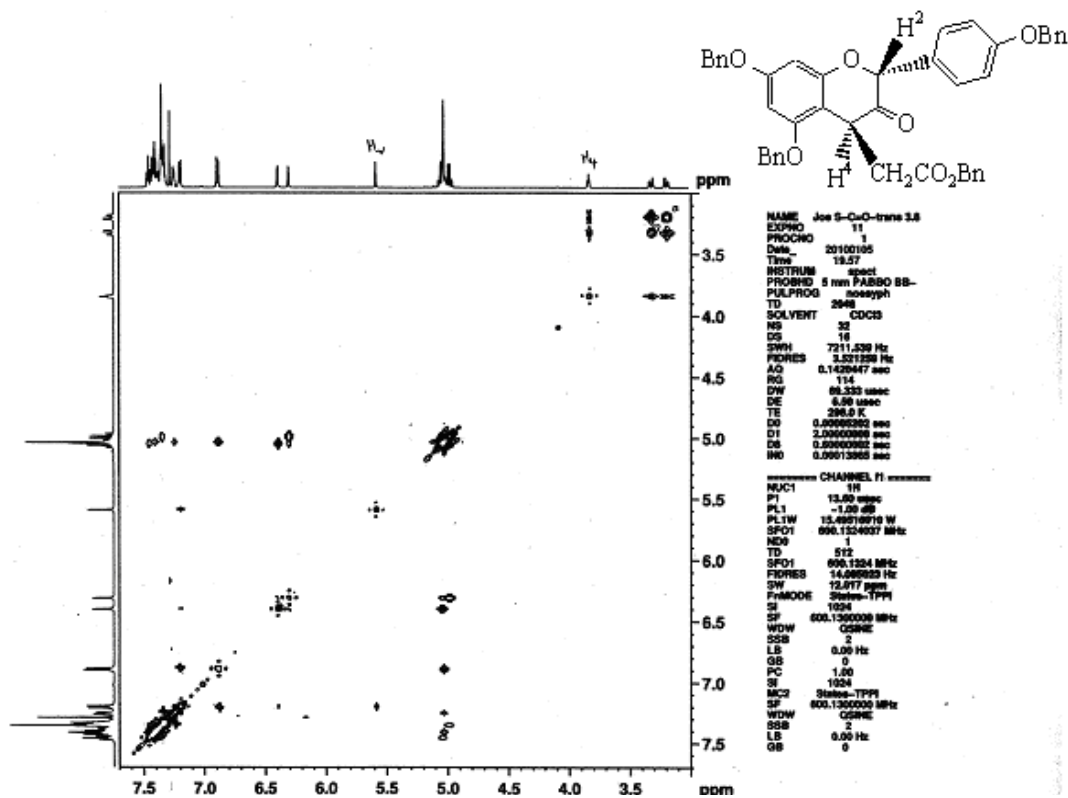

3. 2D NMR (NOESY) of compound 15a.

Archive directory: /export/home/joe/vnmrsys/data  
 Sample directory:  
 File: PROTON  
 Pulse Sequence: s2pul  
 Solvent: CDCl3  
 Ambient temperature  
 INOVA-500 "mar500"  
 Relax. delay 1.000 sec  
 Pulse 45.0 degrees  
 Acq. time 1.892 sec  
 Width 7986.0 Hz  
 S repetitions  
 OBSERVE H1, 499.7394437 MHz  
 DATA PROCESSING  
 FT size 32768  
 Total time 0 min, 23 sec

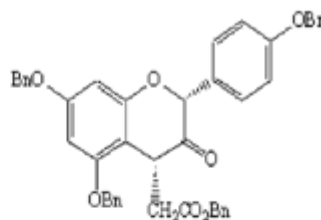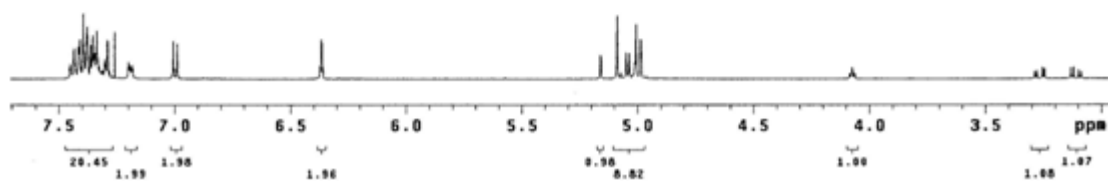

4. <sup>1</sup>H NMR of compound 15b.

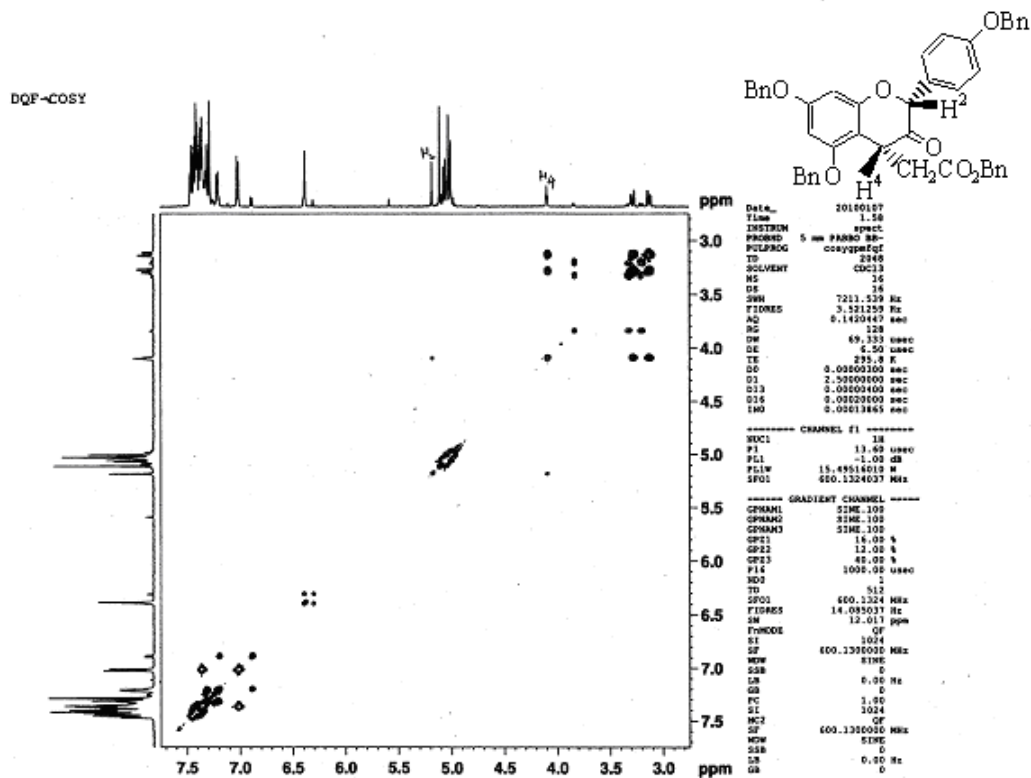

5. 2D NMR (COSY) of compound 15b.

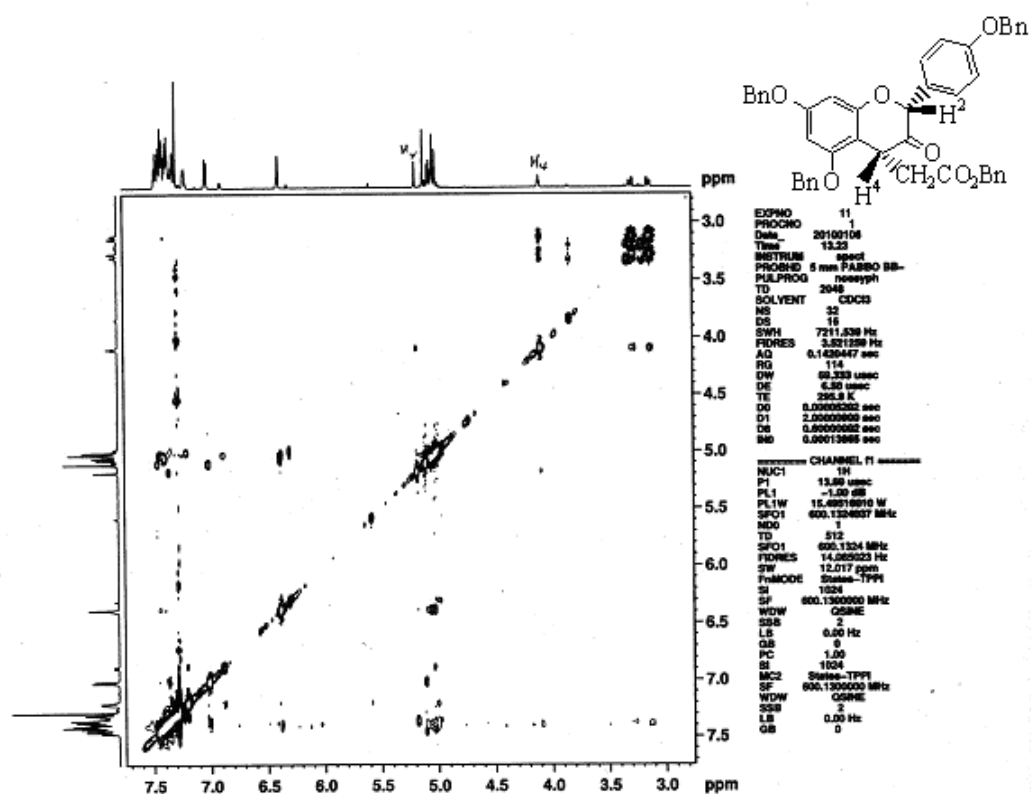

6. 2D NMR (NOESY) of compound 15b.

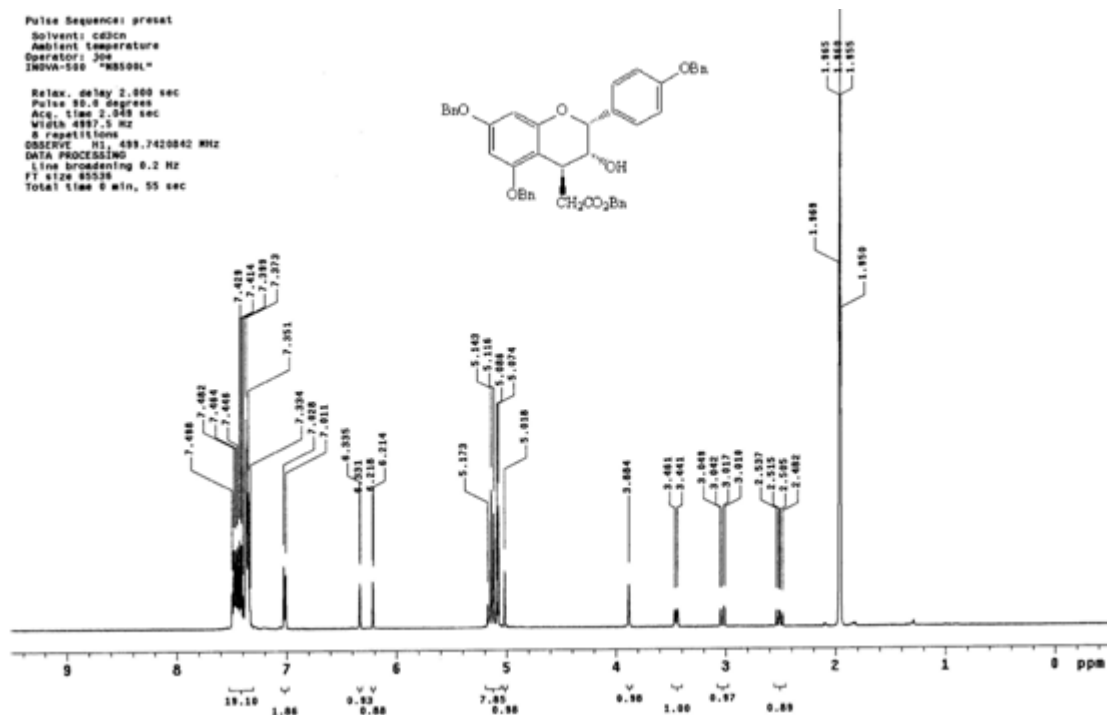

7. <sup>1</sup>H NMR of compound 16.

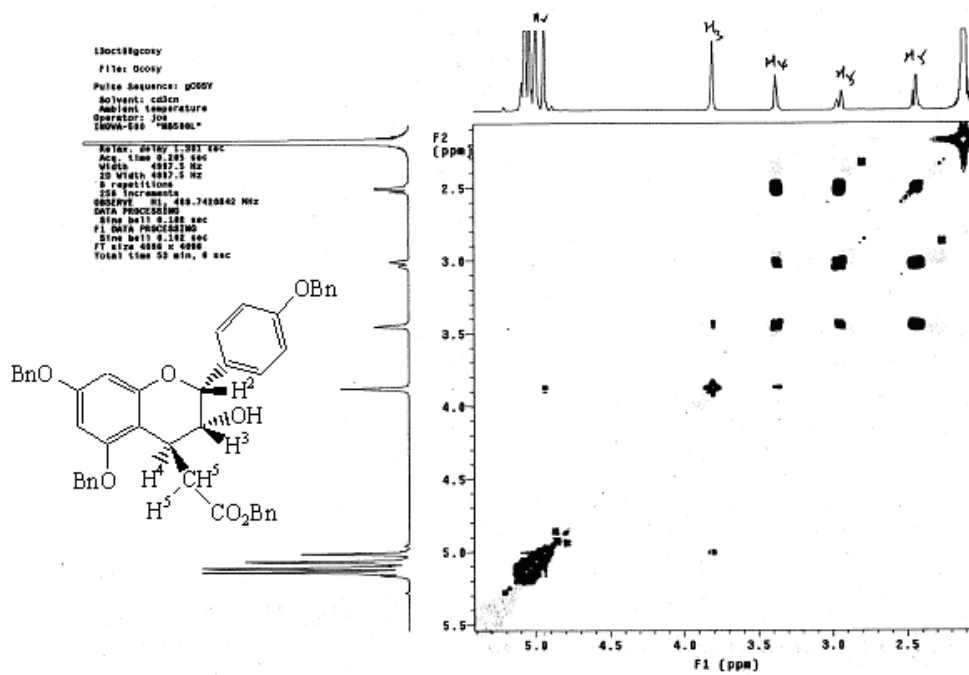

8. 2D NMR (COSY) of compound 16.

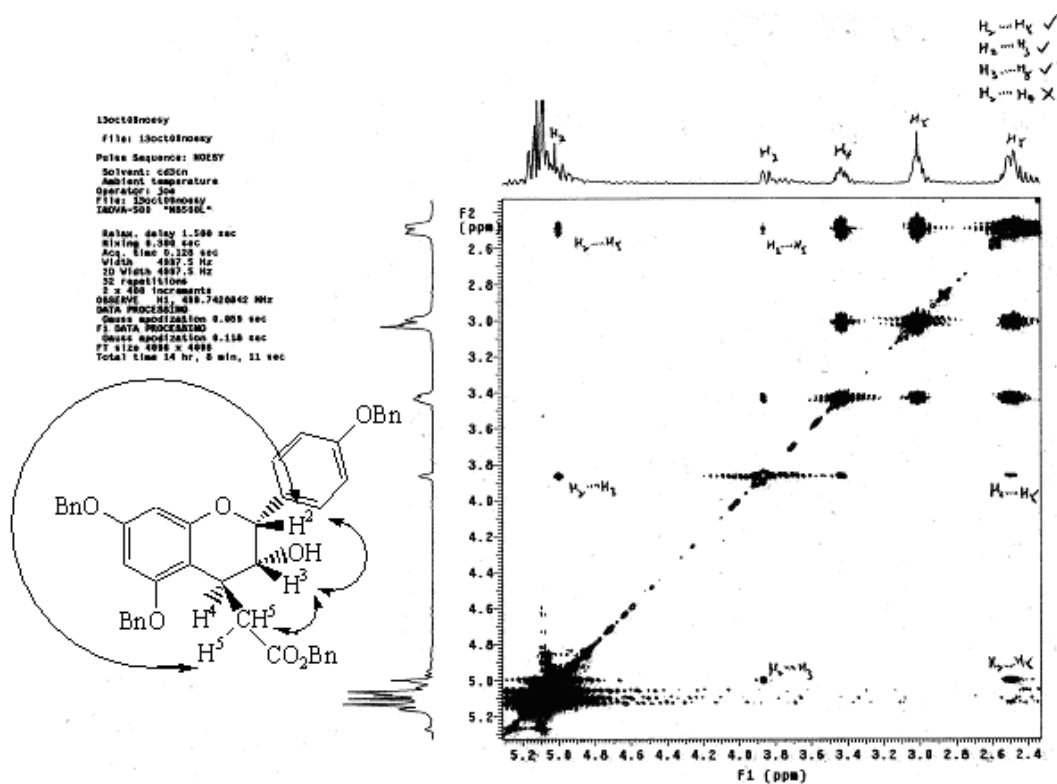

9. 2D NMR (NOESY) of compound 16.

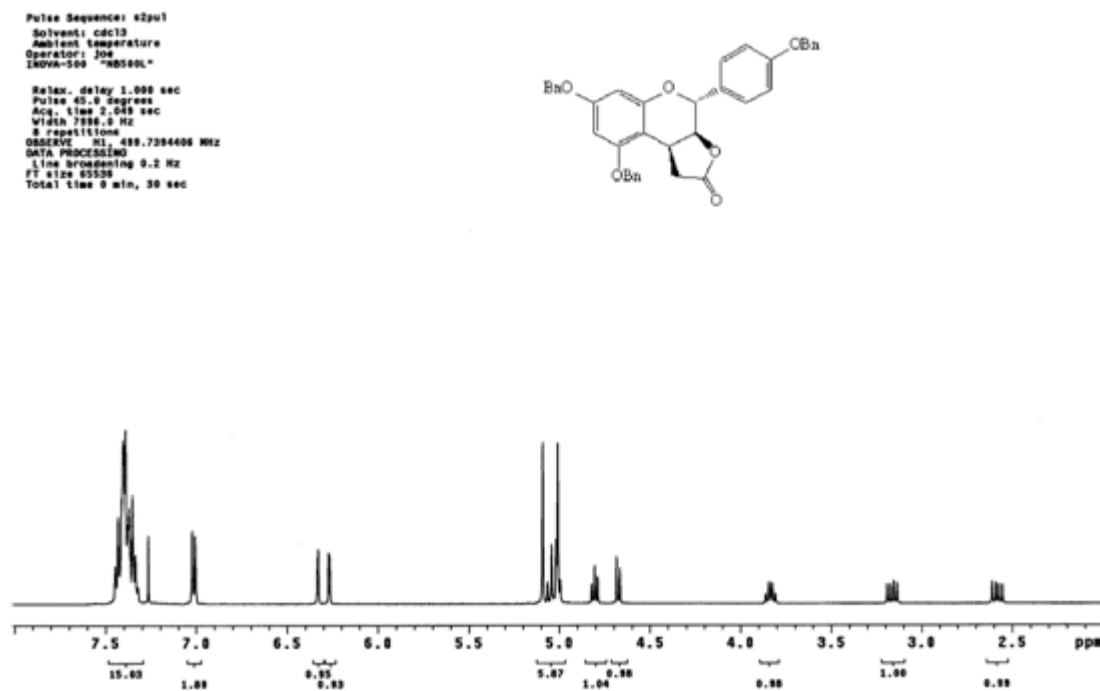

10. <sup>1</sup>H NMR of compound 17.

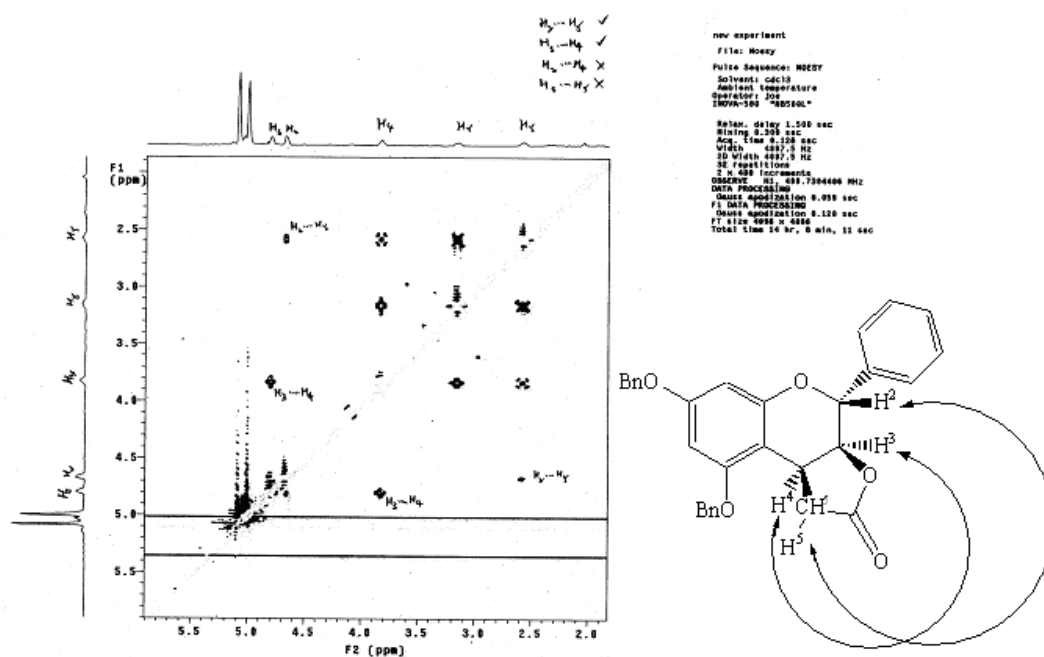

11. 2D NMR (NOESY) of compound 17.

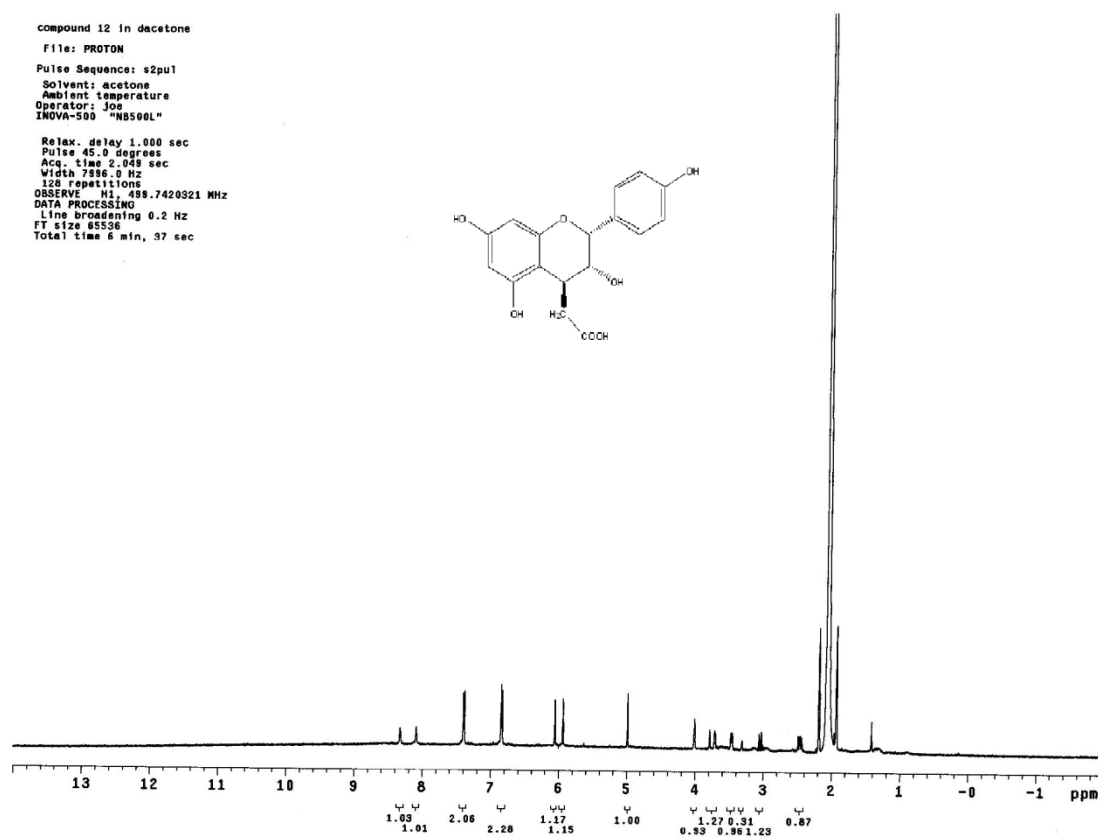

12. <sup>1</sup>H NMR of compound 12.



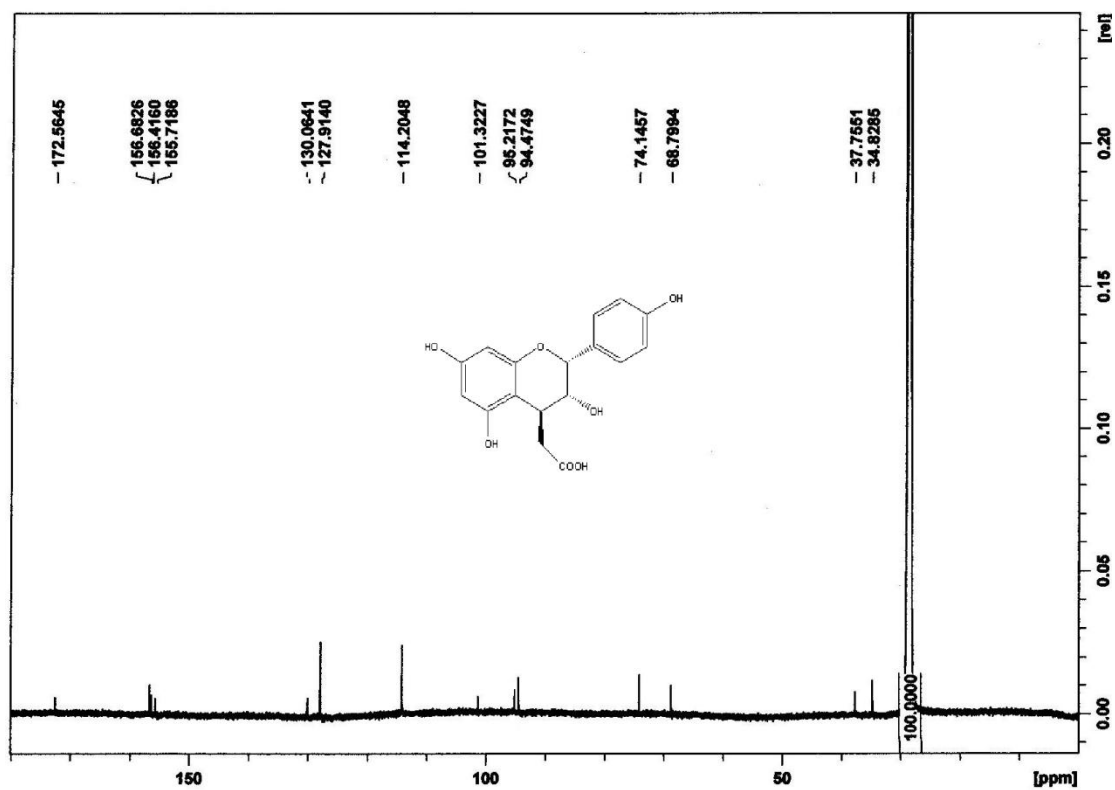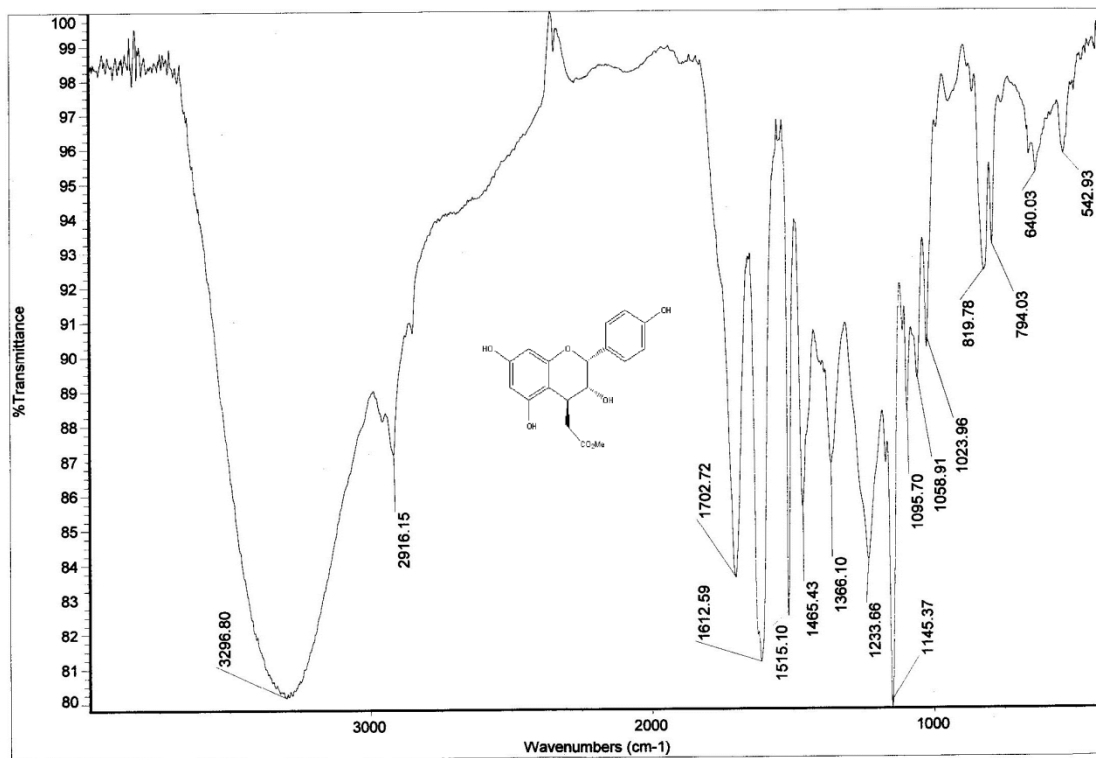

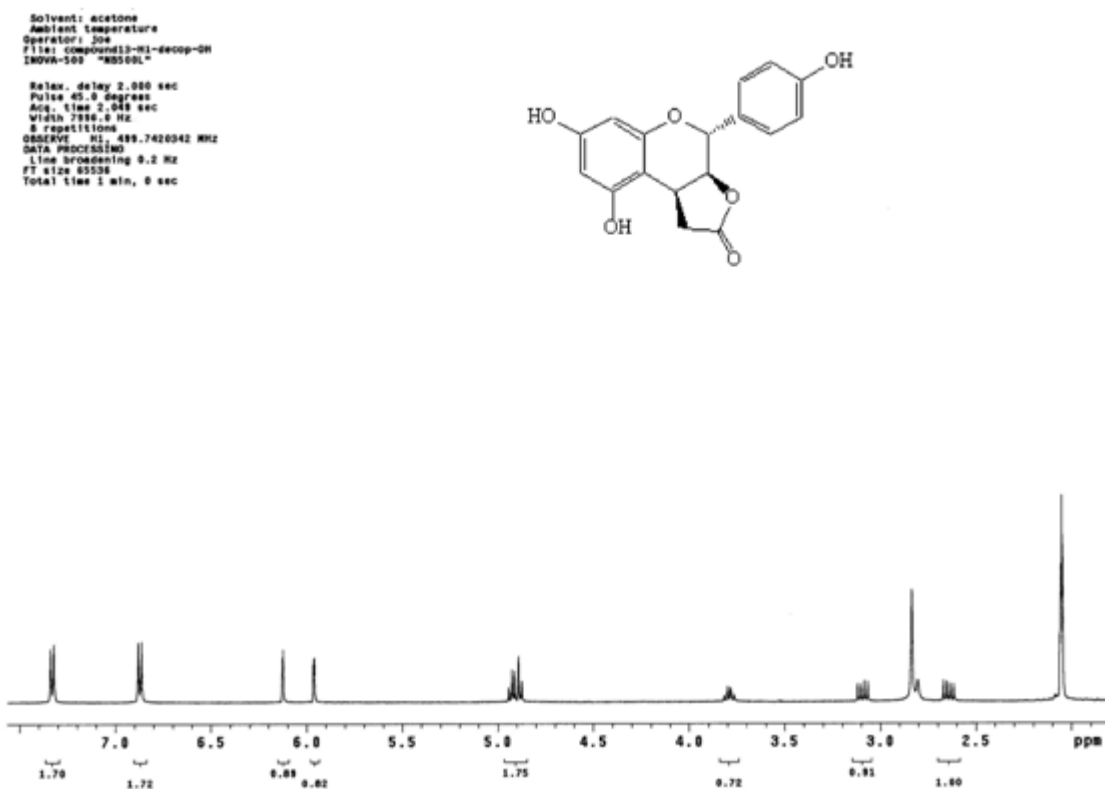

15.  $^1\text{H}$  NMR of compound 13.

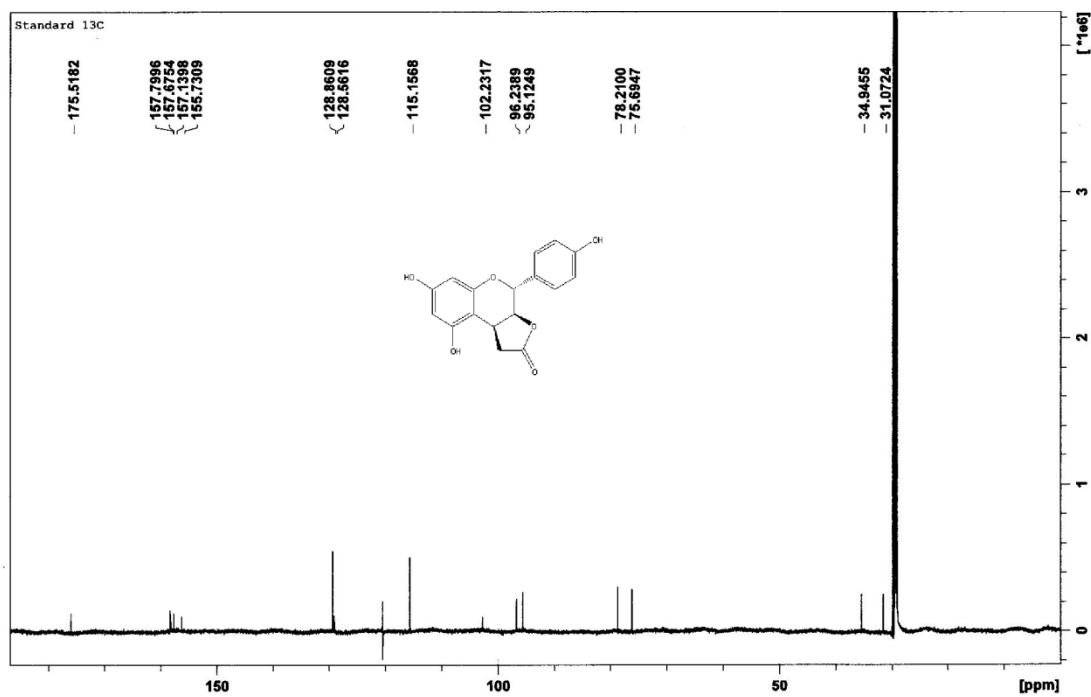

16.  $^{13}\text{C}$  NMR of compound **13**.

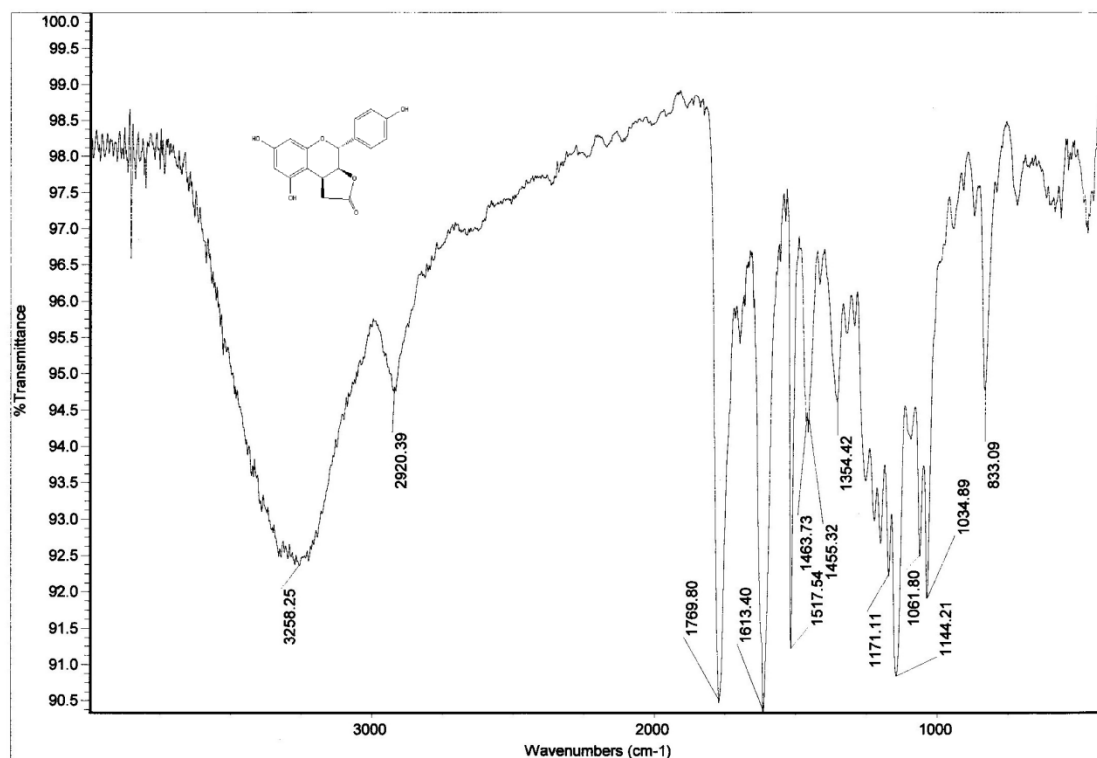

17. IR of compound **13**.

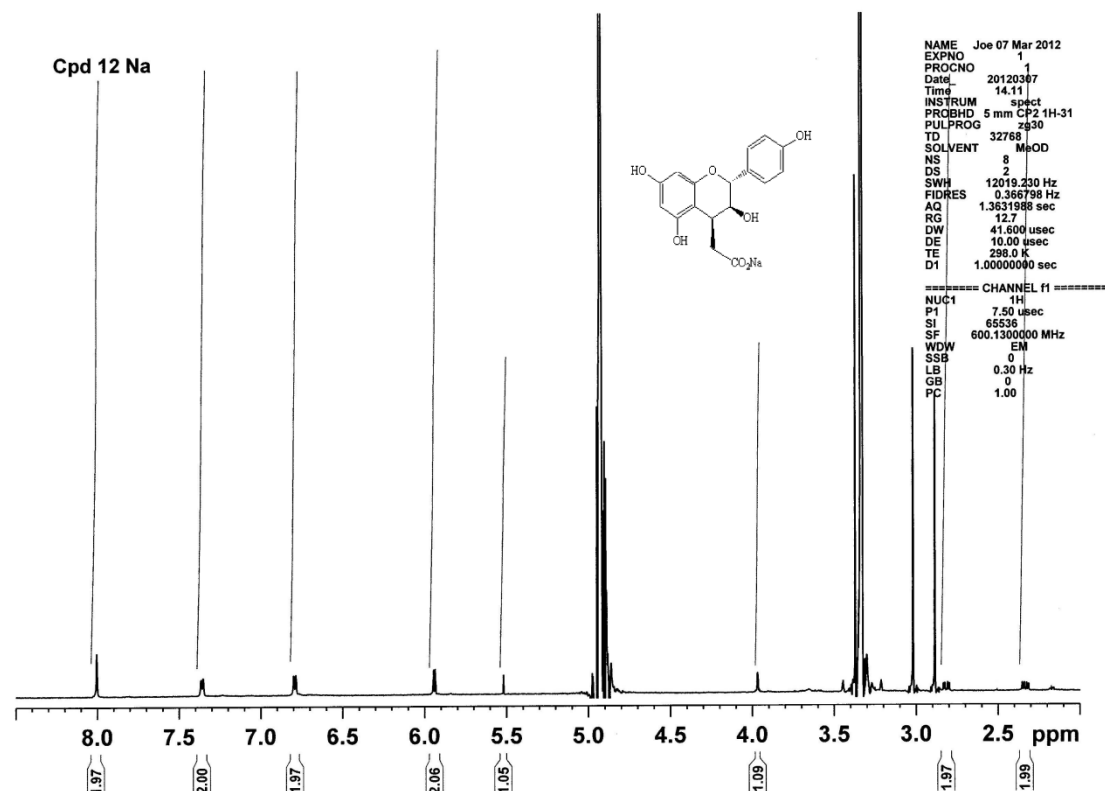

18.  $^1\text{H}$  NMR of compound **12Na**.

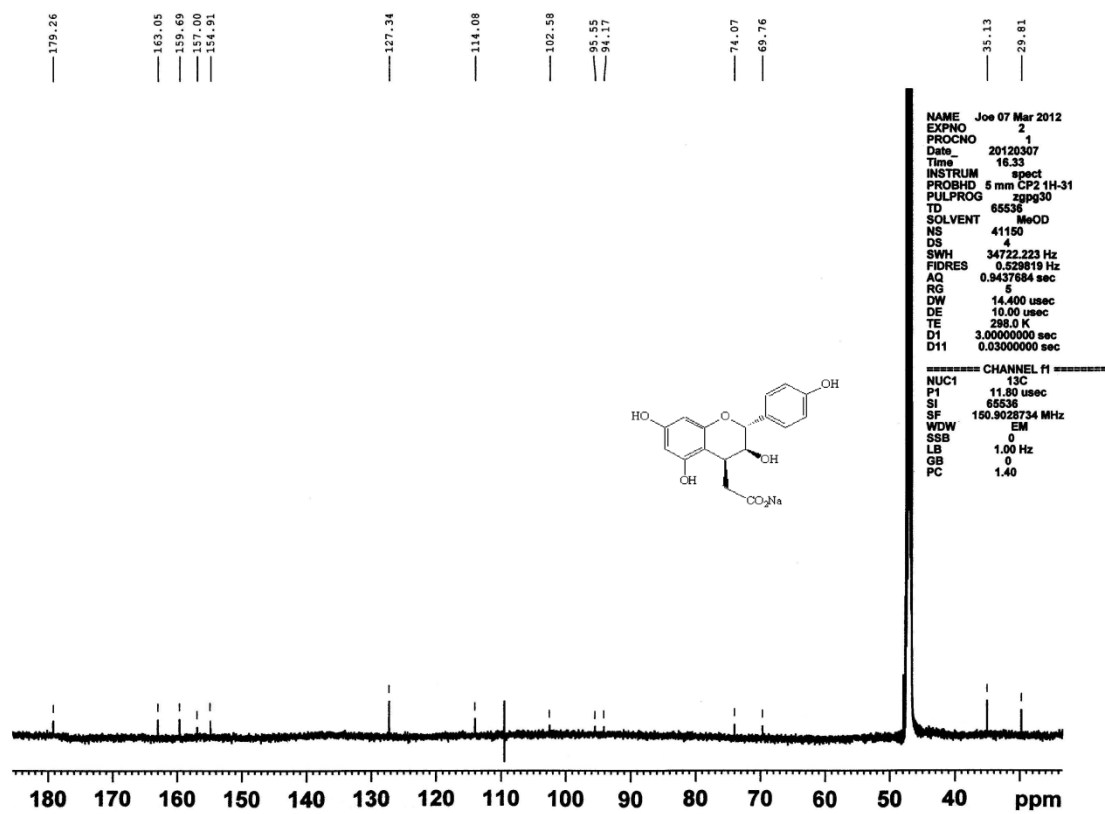

19. <sup>13</sup>C NMR of compound 12Na.
